# Supplementary material for: Electro-oxidative three-component cascade coupling of isocyanides with elemental sulfur and amines for the synthesis of 2-aminobenzothiazoles
Source: Royal Society of Chemistry journal article supplement (doi:10.1039/d4ob00432a), 2024-01-01

# 4haa'

<sup>1</sup>H NMR

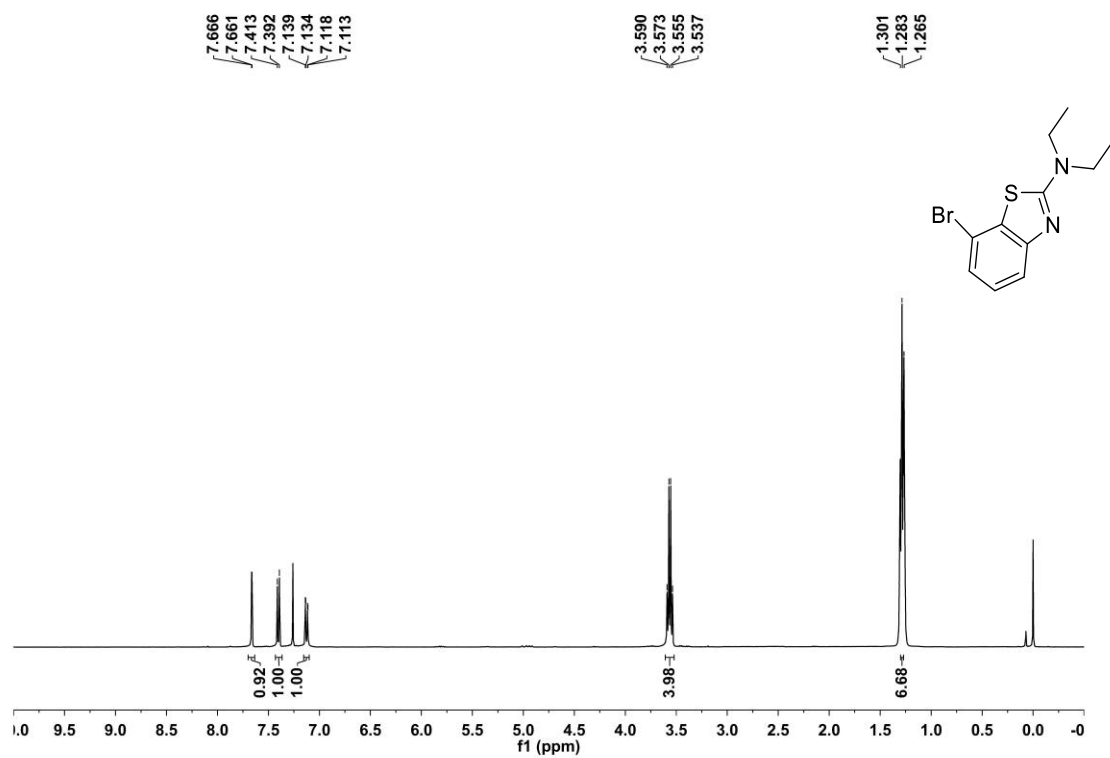

<sup>13</sup>C NMR

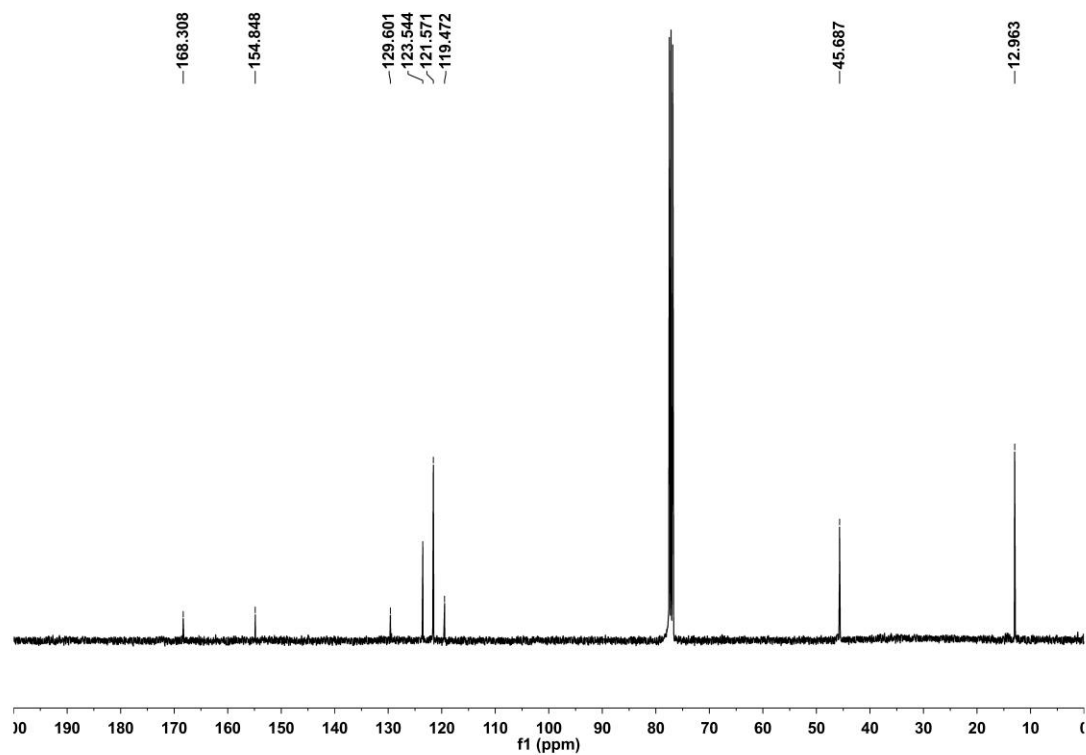

# 4aba

## <sup>1</sup>H NMR

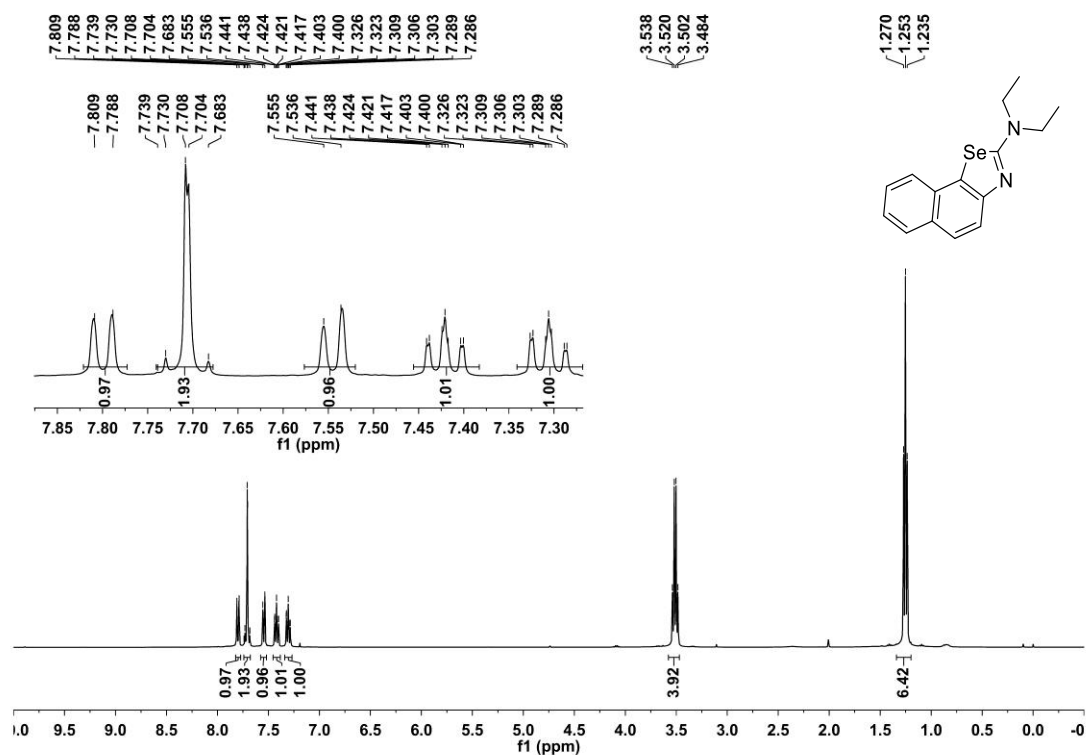

## <sup>13</sup>C NMR

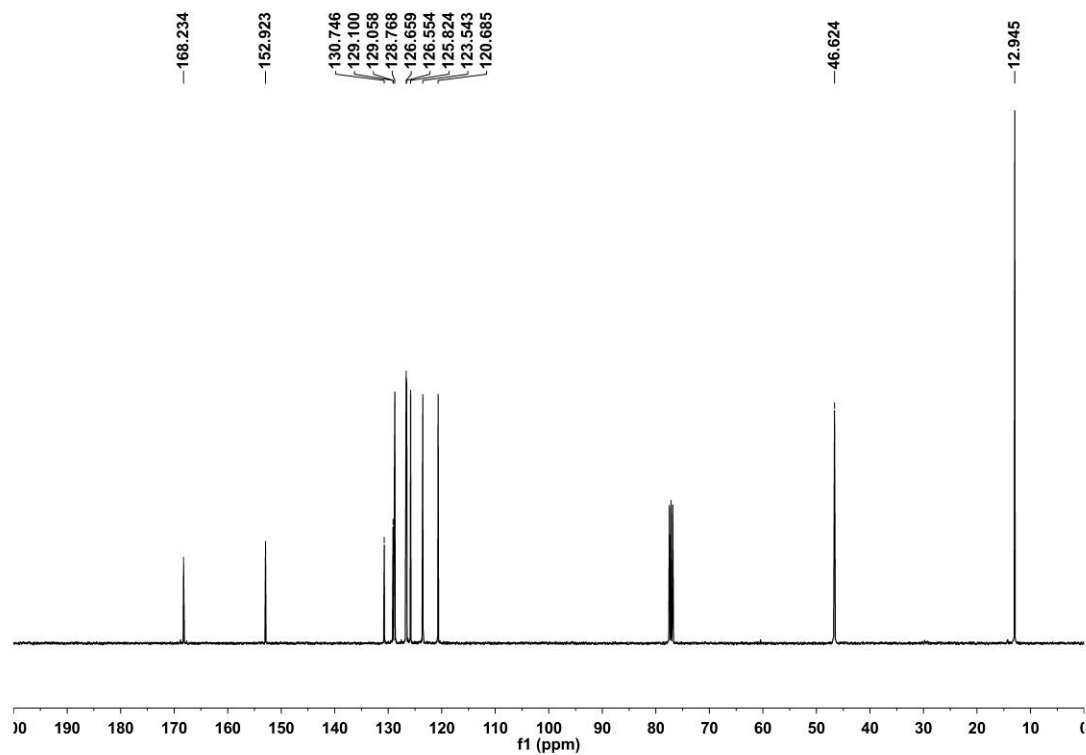

# 4abd

## <sup>1</sup>H NMR

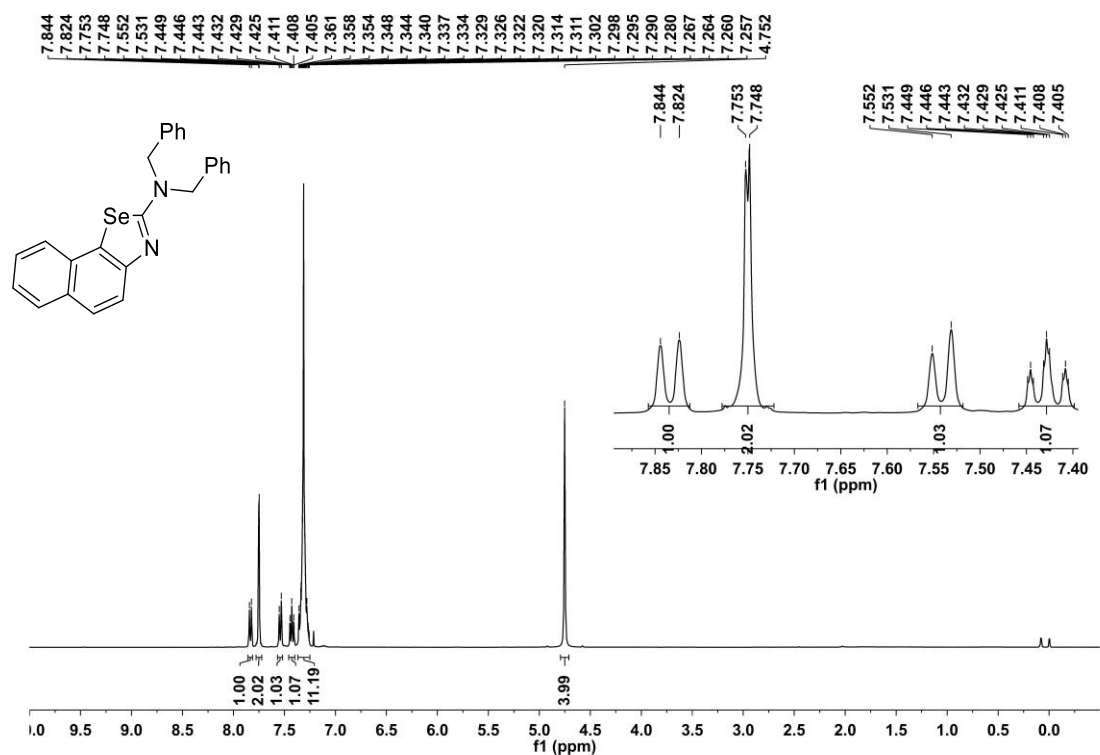

## <sup>13</sup>C NMR

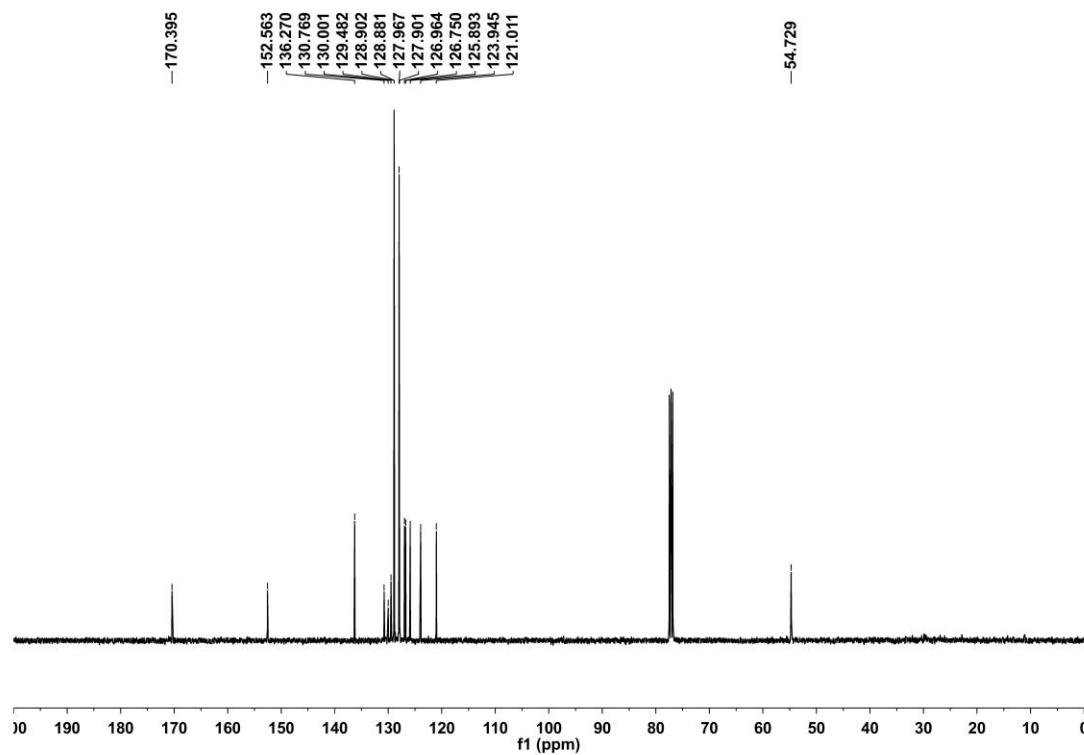

# 4abf

## <sup>1</sup>H NMR

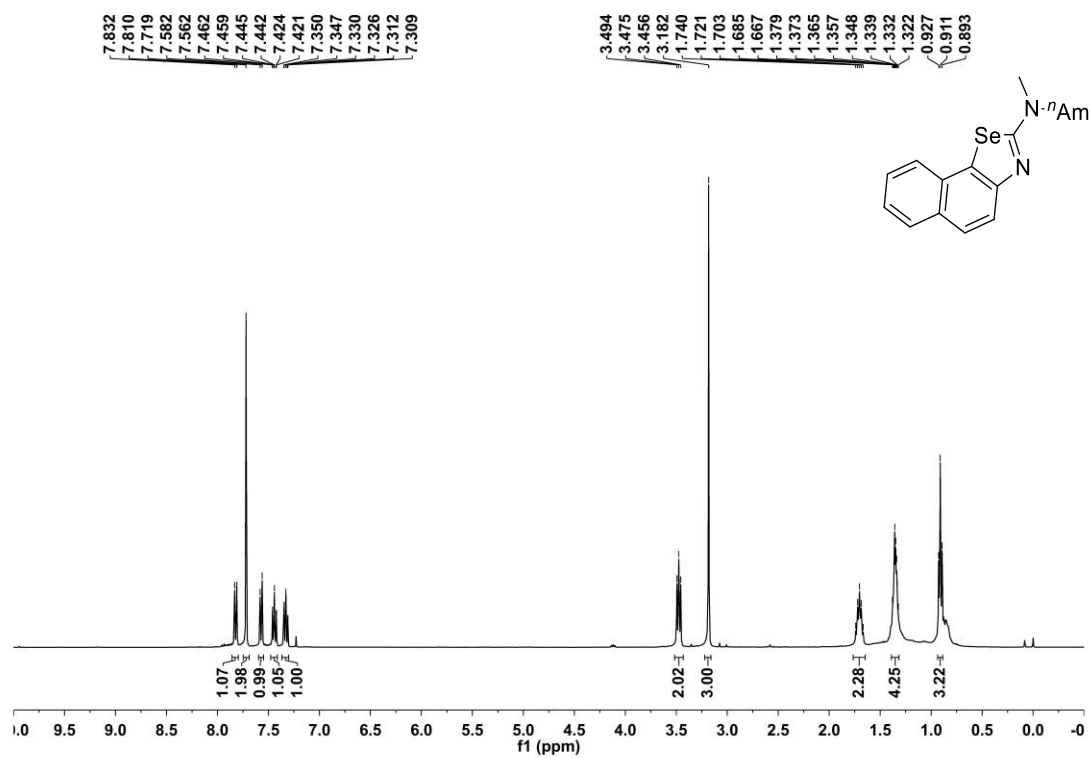

## <sup>13</sup>C NMR

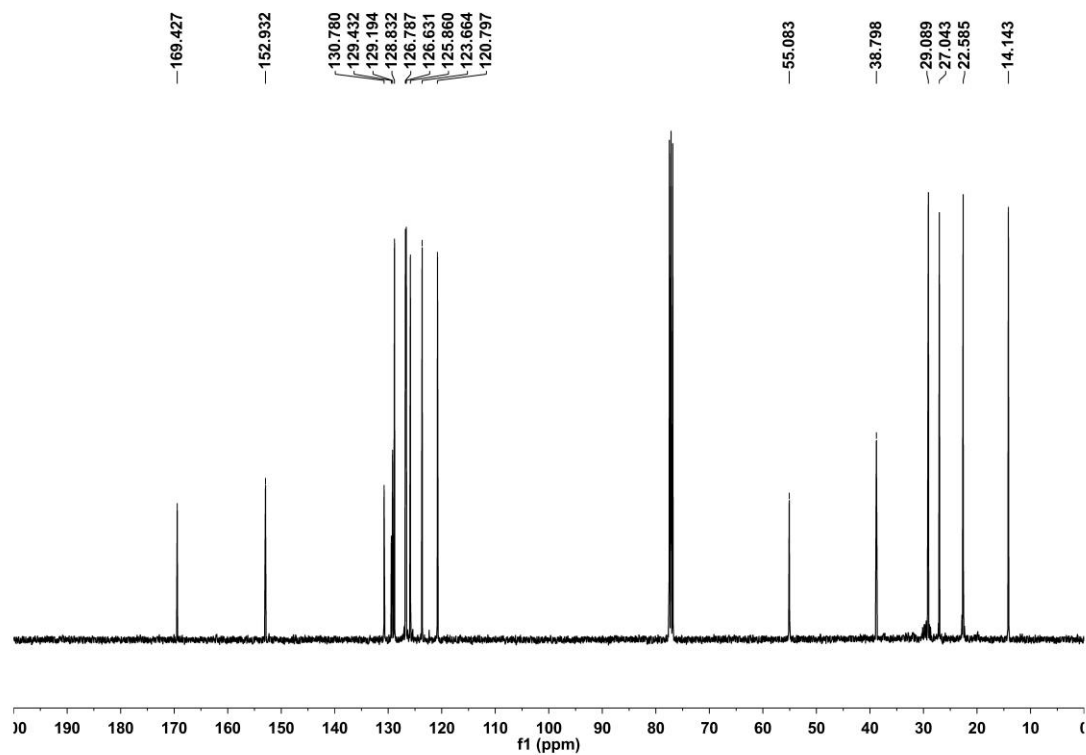

# 4abm

## <sup>1</sup>H NMR

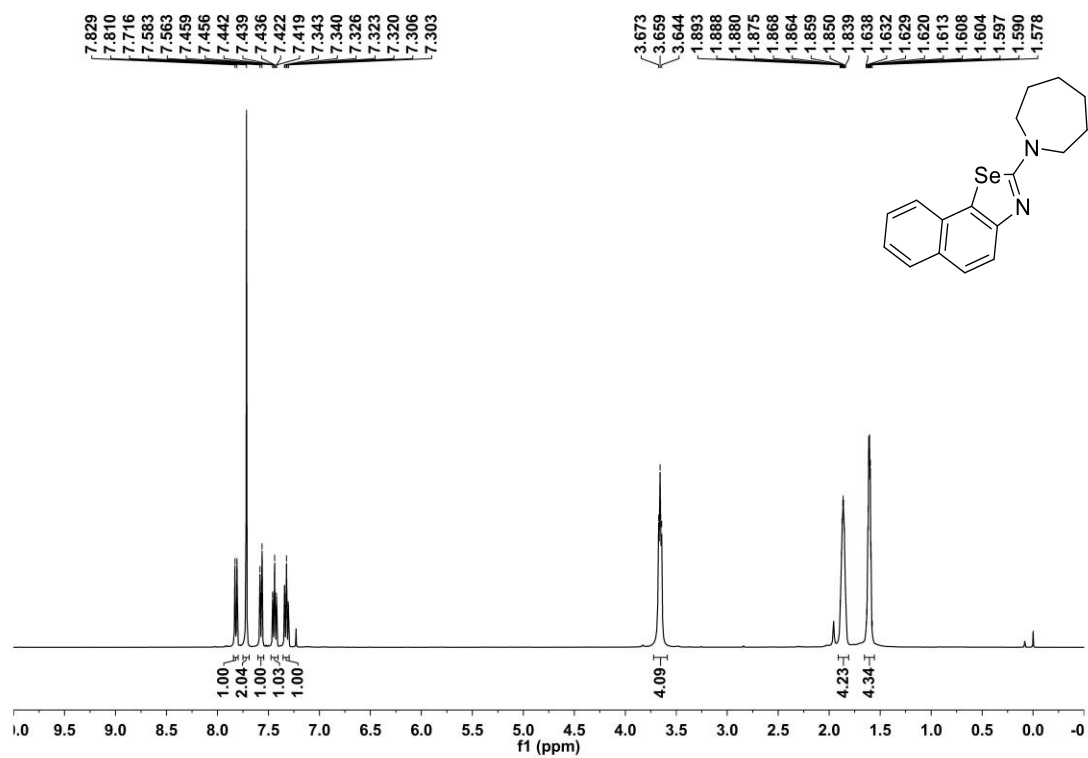

## <sup>13</sup>C NMR

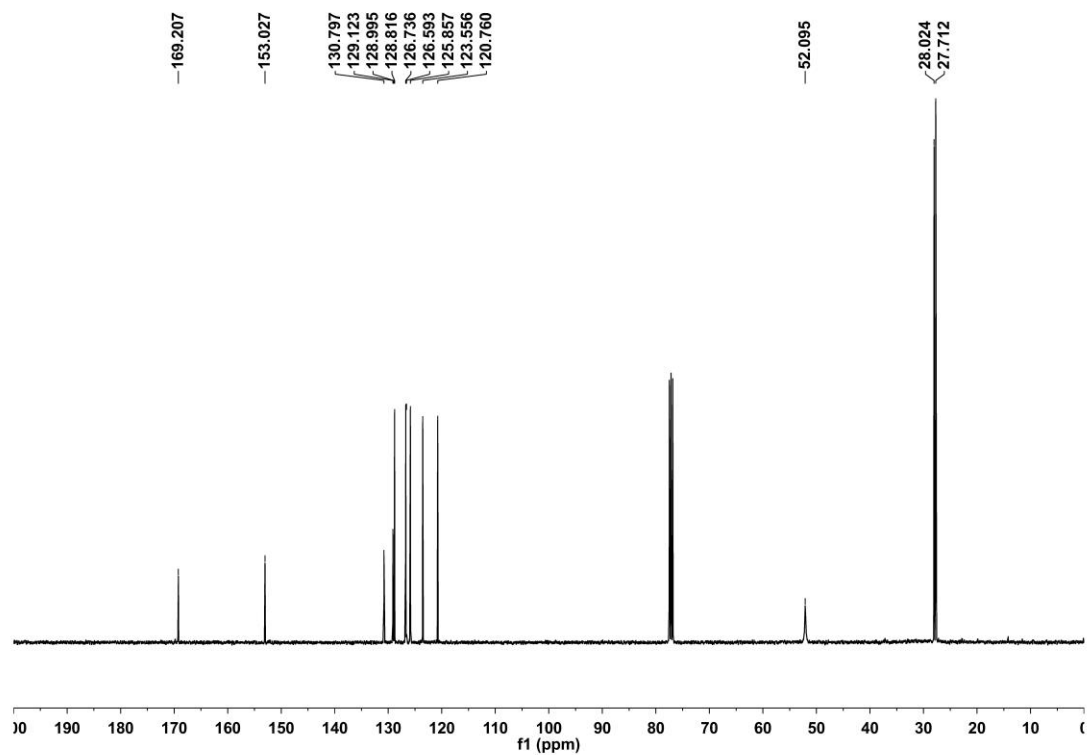

# 4abn

## <sup>1</sup>H NMR

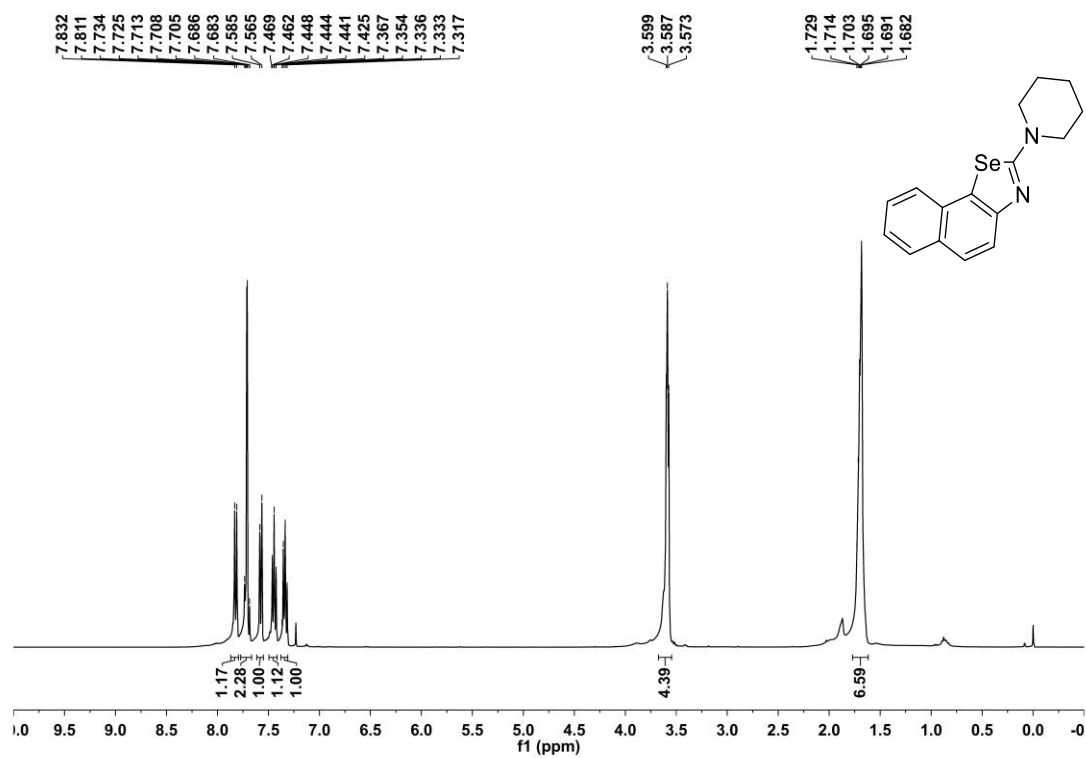

## <sup>13</sup>C NMR

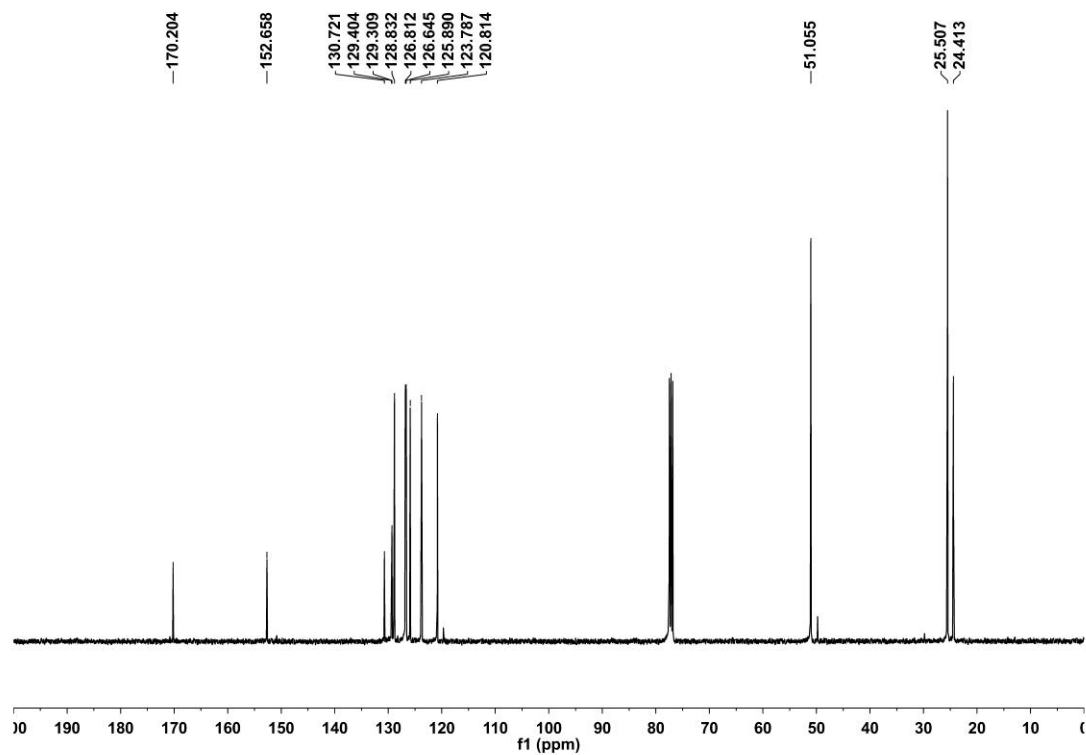

# 4abo

## <sup>1</sup>H NMR

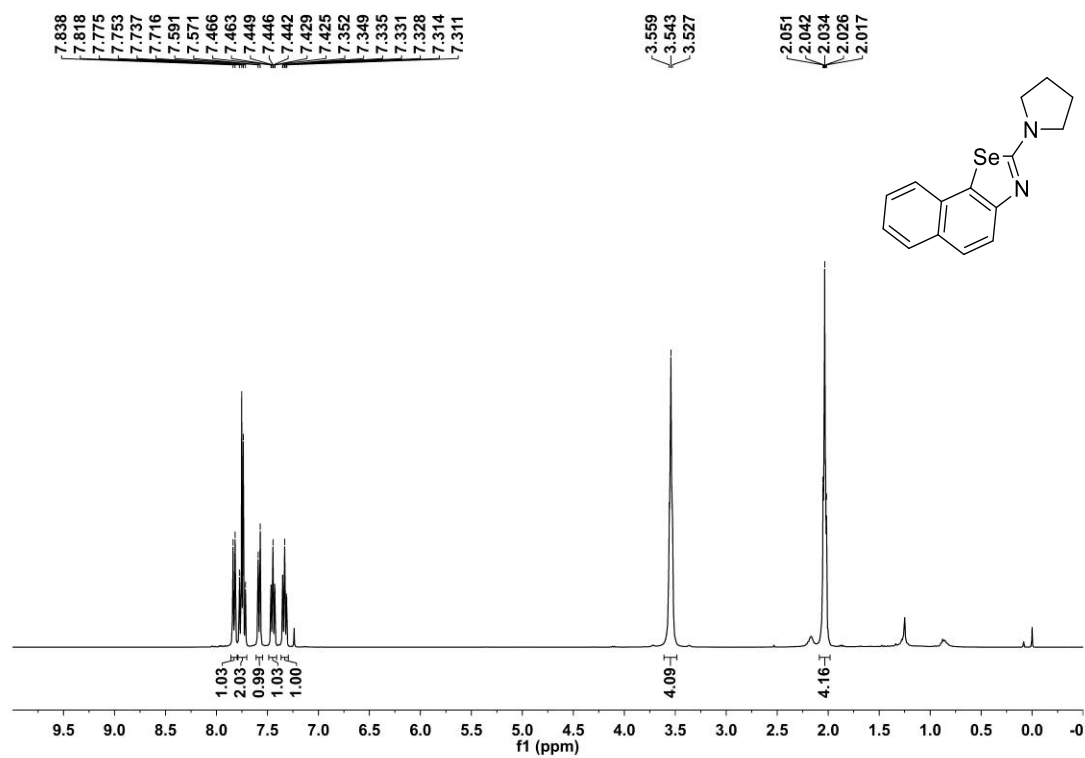

## <sup>13</sup>C NMR

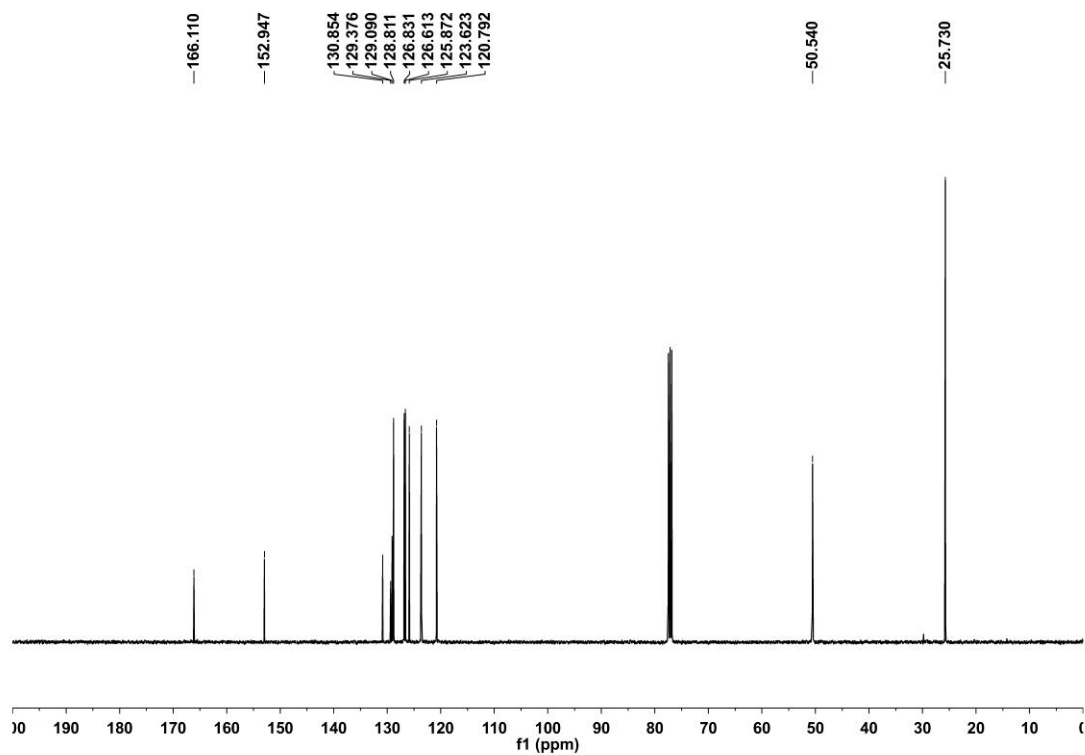

# 4abp

## <sup>1</sup>H NMR

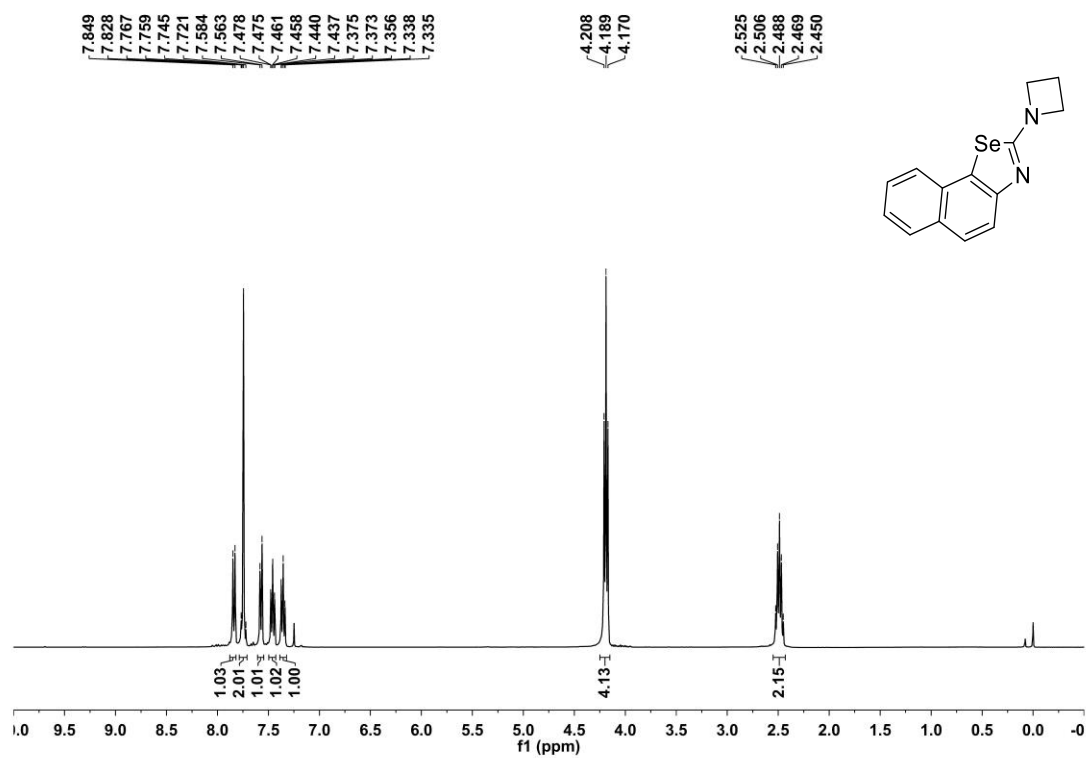

## <sup>13</sup>C NMR

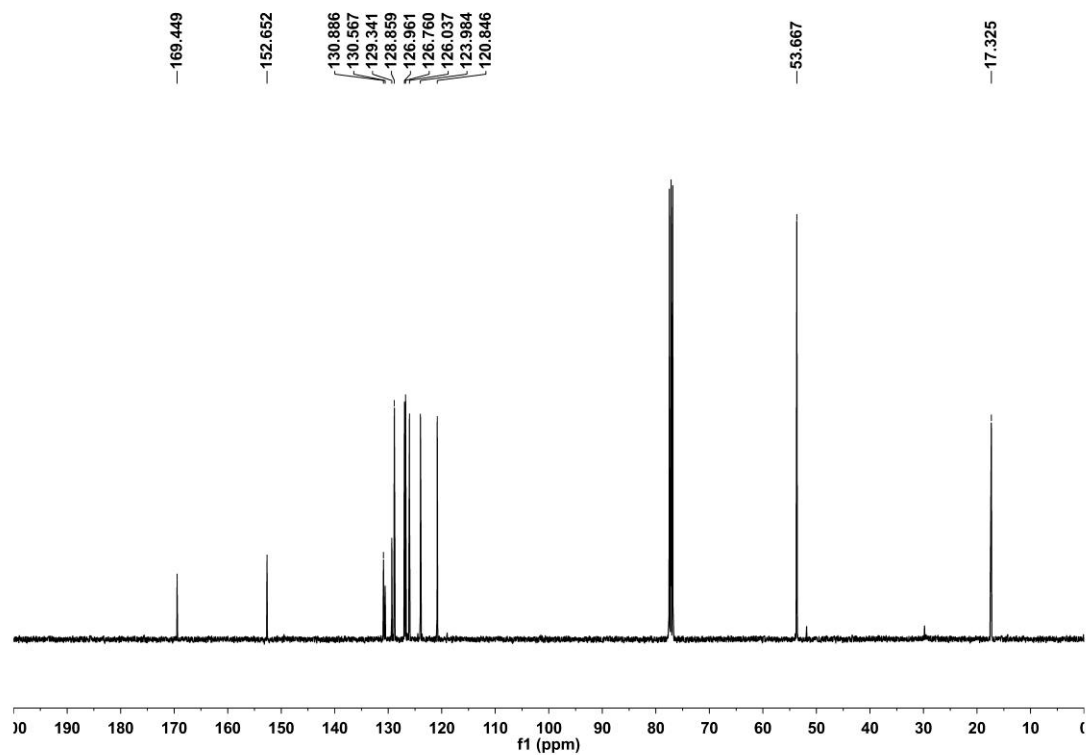

# 4abq

## <sup>1</sup>H NMR

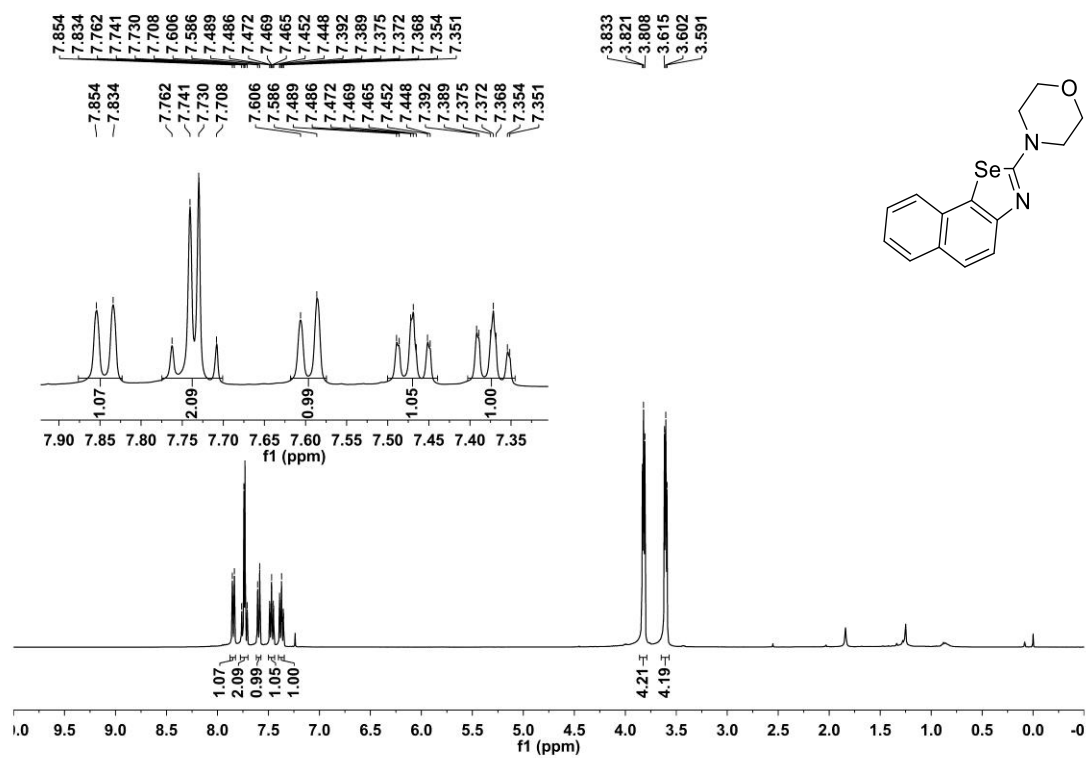

## <sup>13</sup>C NMR

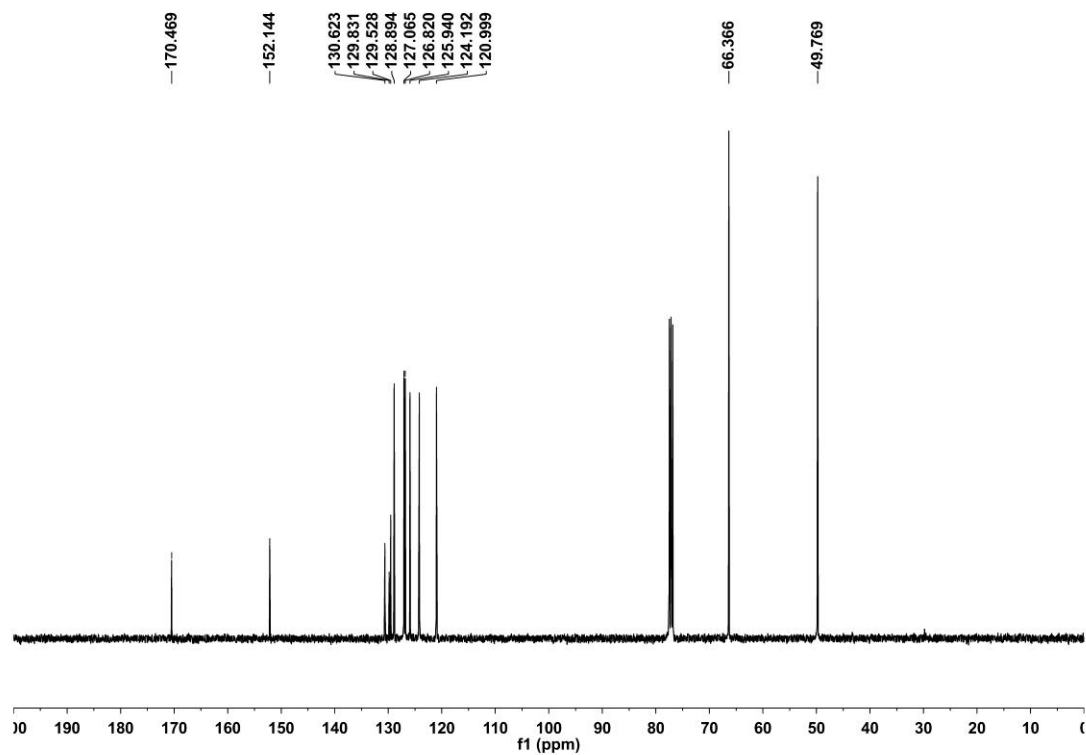

# 4abr

## <sup>1</sup>H NMR

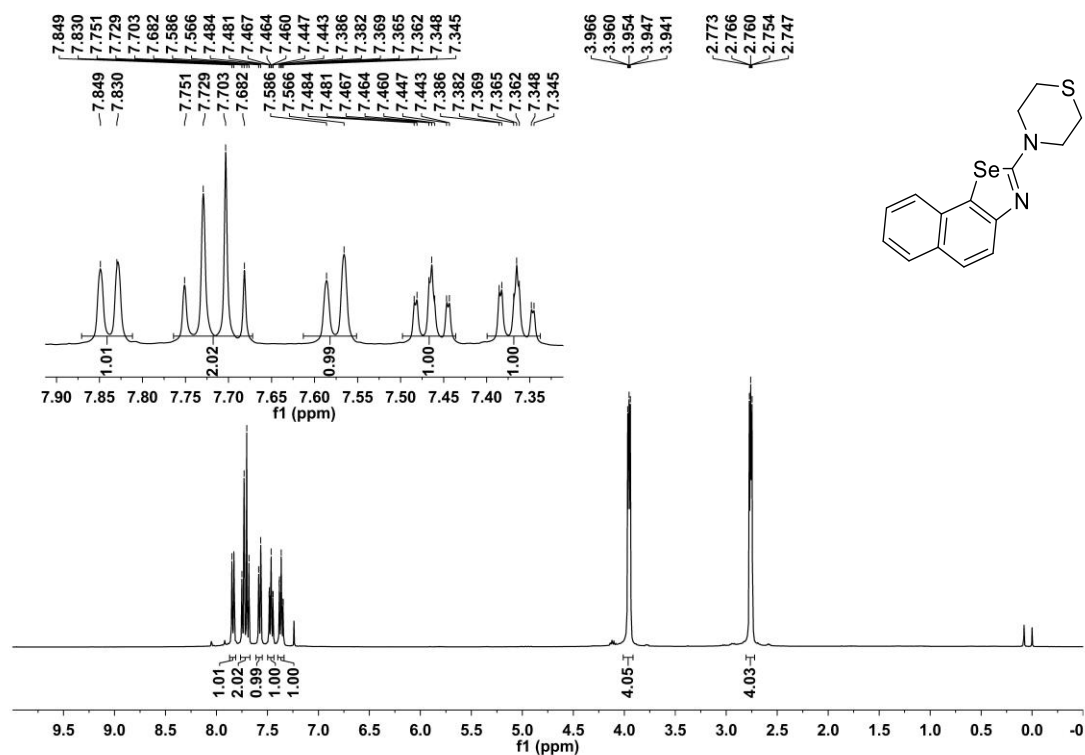

## <sup>13</sup>C NMR

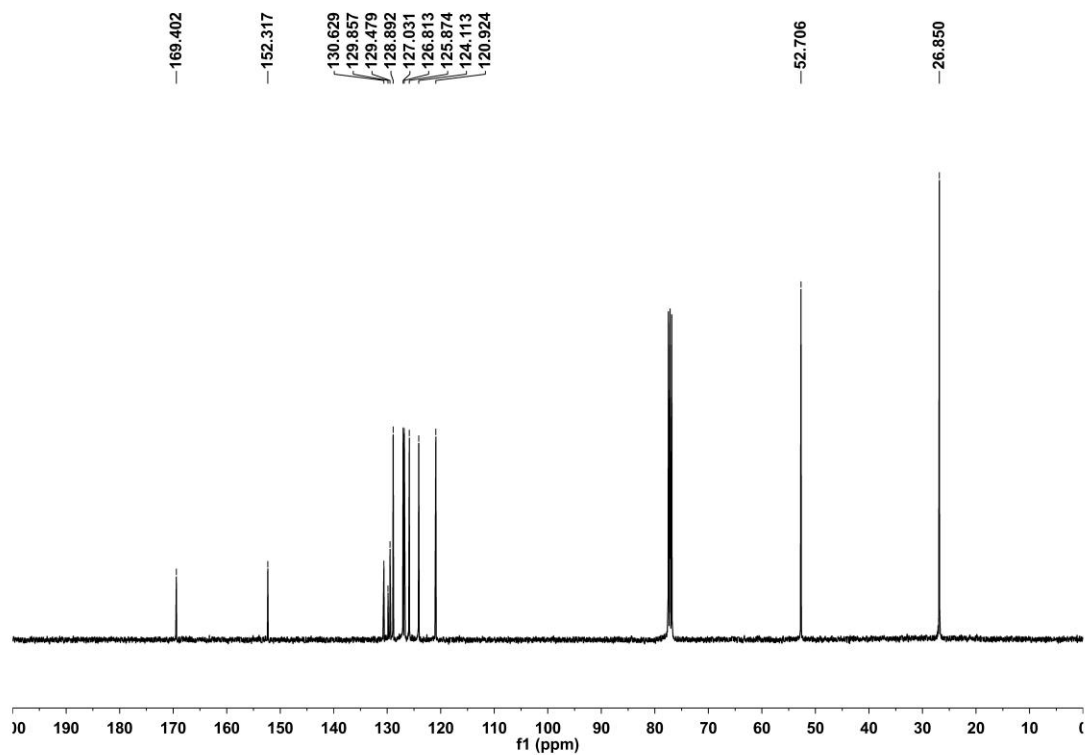

# 4abw

## <sup>1</sup>H NMR

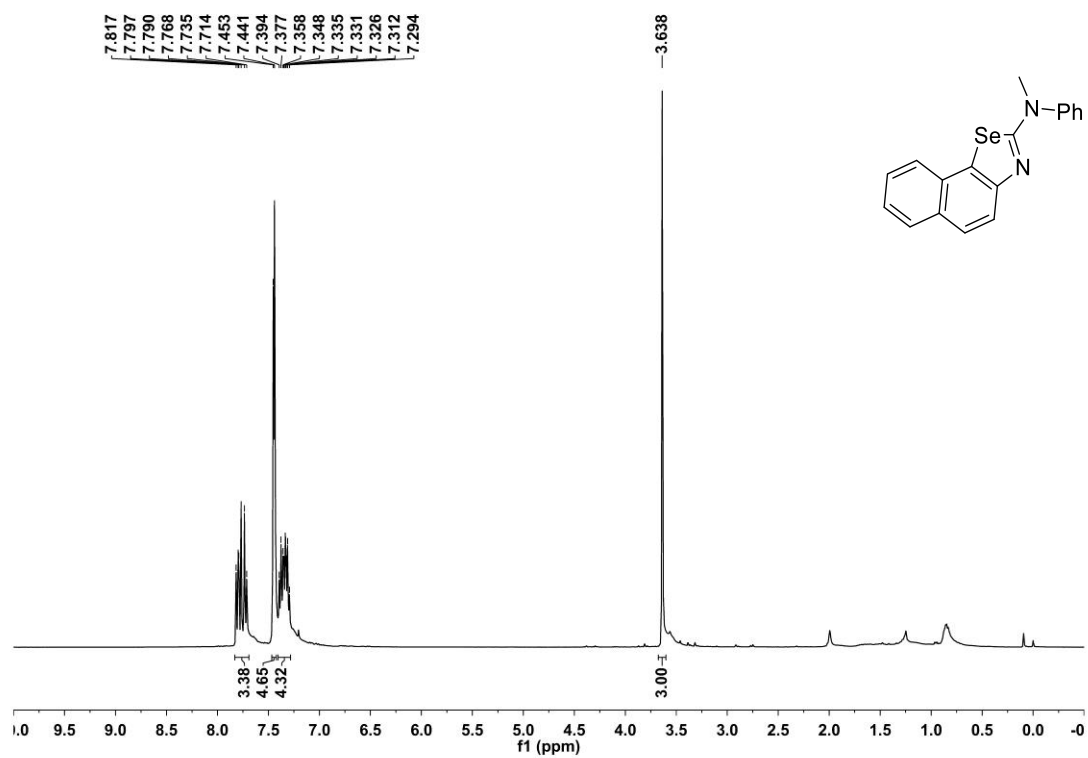

## <sup>13</sup>C NMR

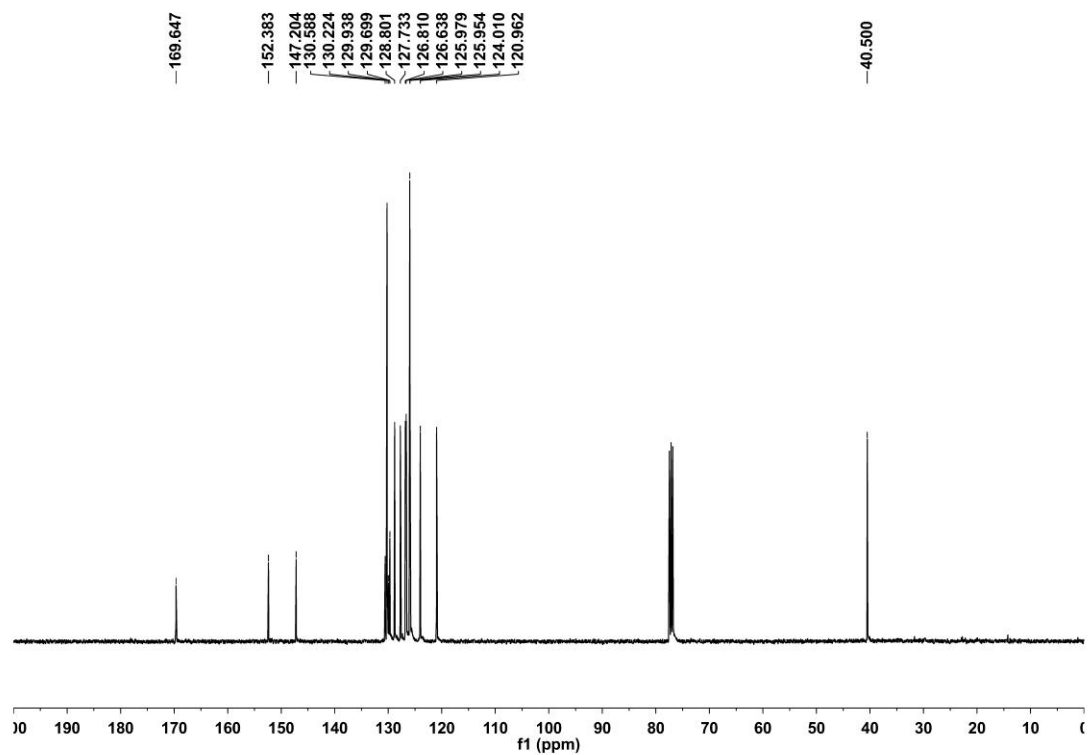

Supplement: d4ob00432a1.pdf [file d4ob00432a1.pdf]
